# Supplementary material
Source: HighWire-hosted journal article supplement (https://jnm.snmjournals.org/highwire/filestream/94961/field_highwire_adjunct_files/0/166025_Supplemental_Data.pdf)
Supplement: 166025_Supplemental_Data.pdf [file 166025_Supplemental_Data.pdf]

**Supplemental Table 1** Pearson correlation coefficients

|                                                     | <b>BAT/SAT ratio</b> | <b>P-value</b> |
|-----------------------------------------------------|----------------------|----------------|
| <b>Arterial TBR</b>                                 | -0.140               | 0.003          |
| <b>Arterial TBR controlling<br/>for age and BMI</b> | -0.118               | 0.014          |
| <b>Age</b>                                          | -0.193               | <0.001         |
| <b>BMI</b>                                          | -0.142               | 0.003          |
